# Supplementary material for: High levels of maternal total tri-iodothyronine, and low levels of fetal free L-thyroxine and total tri-iodothyronine, are associated with altered deiodinase expression and activity in placenta with gestational diabetes mellitus
Source: PLoS One. 2020 Nov 24;15(11):e0242743. doi: 10.1371/journal.pone.0242743 (PMC7685482; doi:10.1371/journal.pone.0242743)
Supplement: S1 Data — (XLSX) [file pone.0242743.s002.xlsx]

## Sheet: Hoja1
											1st trimester				2nd trimester				3rd trimester				Newborn parameters
	Age (years)	Height (m)	Weight 1T (Kg)	Weight 2T (Kg)	Weight gain (Kg)	BMI 1T (Kg/m2)	BMI 3T (Kg/m2)	Basal Glycaemia 1T (mg/dl)	Basal Glycaemia 2T (mg/dl)	Glycaemia 2h post 75 g (2T) (mg/dl)	TSH (mIU/L)	FT4 (ng/dl)	TT4 (ug/ml)	TT3 (ng/ml)	TSH (mIU/L)	FT4 (ng/dl)	TT4 (ug/ml)	TT3 (ng/ml)	TSH (mIU/L)	FT4 (ng/dl)	TT4 (ug/ml)	TT3 (ng/ml)	Gestational age (weeks)	Weight (g)	Height (cm)	Ponderal index (g/cm3)	Sex (M or F)	TSH (mIU/L)	FT4 (ng/dl)	TT4 (ug/ml)	TT3 (ng/ml)
Patient 1	32	1.6	78.3	89.6	11.3	30.6	35	82.6	82	102.8	2.3	1	11.3	1.6	2.4	0.87	13.3	1.8	2	0.65	10.3	1.6	38.7	3700	48.8	3.18	F	3.2	1.1	12.4	2
Patient 2	29	1.61	76	87.2	11.2	29.5	33.8	79.2	82.1	109.9	2.1	1	11.8	1.7	2.2	0.75	12.3	1.8	1.9	0.6	10.5	1.6	38.6	3640	50.9	2.76	M	3.2	1.1	12.6	2
Patient 3	29	1.57	78.1	88.3	10.2	31.7	35.8	79.4	82.6	113.1	2	1	11	1.7	2.2	0.78	12	1.9	2.1	0.76	10.1	1.6	38.6	3521	49	3	F	3.3	1.2	12	2
Patient 4	31	1.6	77.4	87.6	10.2	30.1	34.1	79.1	82.3	113.1	2.5	1	10.6	1.6	1.8	0.71	13.3	1.9	2	0.77	11.2	1.6	38.4	3605	51.2	2.68	M	3.2	1.2	12.4	2
Patient 5	28	1.59	78.6	90.4	11.8	31.2	35.8	83	82.5	102.8	2.5	1	11.6	1.7	2.4	0.78	12.1	1.9	1.9	0.64	11.3	1.6	38.6	3659	50.9	2.77	M	3.1	1.2	11.8	2
Patient 6	31	1.59	76.5	88.2	11.7	30.2	34.9	80.8	82.6	104	2.4	1	12.1	1.7	2.4	0.84	12.9	1.9	2.2	0.63	10.7	1.7	38.6	3705	49.3	3.09	F	2.9	1.1	11.7	1.9
Patient 7	29	1.58	75.6	85.9	10.3	30.3	34.4	83.6	82.7	103.9	2.3	1	12.4	1.6	1.7	0.89	12	1.7	2.1	0.71	10.4	1.6	38.5	3616	48.8	3.1	M	3.2	1.2	11.4	1.9
Patient 8	29	1.58	76.1	87.2	11.2	30.4	34.9	80	82	109.4	2.2	1	12.2	1.7	2.1	0.89	11.6	1.9	2.3	0.74	11.2	1.7	38.4	3648	51.1	2.74	M	3.1	1.2	12.7	2
Patient 9	30	1.6	77.5	88.7	11.3	30.3	34.7	82.5	82.6	110	1.8	1	12.2	1.6	2	0.77	13	1.8	2	0.65	10.4	1.7	38.5	3607	50.6	2.78	F	3	1.2	12.6	1.9
Patient 10	29	1.6	75.8	86.8	11	29.5	33.8	82.5	82.1	113	2.2	1	10.6	1.7	2	0.77	12.6	1.8	2.1	0.69	10.6	1.5	38.7	3667	50.1	2.92	M	3.3	1.2	11.9	1.9
Patient 11	29	1.59	75.6	87.4	11.8	29.9	34.6	83	82.3	109.9	2.5	1.1	11.5	1.8	1.9	0.81	12.9	1.9	2.2	0.65	11.5	1.6	38.5	3515	51.4	2.59	M	3.2	1.1	12.8	1.9
Patient 12	32	1.6	79	90.4	11.4	30.9	35.4	82.8	82.1	104.3	2	0.9	10.7	1.7	2	0.76	11.8	1.8	2.1	0.65	11.5	1.6	38.5	3524	49.3	2.95	F	3	1.2	12	1.8
Patient 13	32	1.6	75.6	86.7	11.1	29.7	34.1	80	82.7	109.1	1.9	1.1	11	1.8	1.9	0.71	13	1.8	2.2	0.72	10.6	1.6	38.6	3689	50.1	2.94	M	3	1.2	12.3	2
Patient 14	30	1.57	79.6	91	11.3	32.2	36.8	83.3	82.5	110.9	1.9	1	11.4	1.8	1.6	0.83	11.7	1.9	2.3	0.66	10.8	1.5	38.4	3697	48.5	3.24	M	3.2	1.2	11.9	1.8
Patient 15	32	1.6	79.2	89.2	10.1	30.8	34.7	82.4	82.5	109.6	2.2	1.1	11	1.6	2.3	0.79	12.5	1.9	2.1	0.64	11.7	1.5	38.6	3717	48.8	3.19	F	3.3	1.1	11.9	1.9
Patient 16	28	1.59	78.6	89.6	11	30.9	35.3	83.5	82.1	101.2	2.5	1.1	12.1	1.6	2.3	0.86	12.6	1.8	2	0.77	11.7	1.6	38.7	3629	50.1	2.89	M	3.4	1.1	11.6	1.9
Patient 17	30	1.61	77.3	89	11.7	30	34.5	79.5	82.4	101.6	2.5	0.9	12.4	1.8	1.9	0.72	12.9	2	2.3	0.64	10.1	1.7	38.6	3643	50.1	2.9	M	3.4	1.2	12.7	1.9
Patient 18	29	1.58	76.8	88	11.1	30.9	35.3	78.9	81.9	108.3	2.2	1	11.9	1.8	1.7	0.85	12.9	1.7	2.1	0.79	10.8	1.6	38.6	3503	48.8	3.02	M	3.1	1.1	11.6	1.9
Patient 19	31	1.6	75.8	86.5	10.7	29.7	33.8	82	82.2	106.1	2.2	1.1	10.8	1.7	2	0.87	13.3	1.9	2.1	0.77	10.6	1.6	38.5	3546	51.1	2.67	F	3.4	1.1	12.3	2
Patient 20	30	1.59	78	88.3	10.3	30.8	34.9	80.4	82.3	101.8	2	1	12	1.8	2.1	0.89	12.3	1.8	2.1	0.61	10.9	1.5	38.6	3558	51.4	2.61	M	3.1	1.1	11.9	2
Patient 21	29	1.61	79	90.1	11.2	30.5	34.8	80.6	82.2	113.4	2.2	1	11.8	1.7	2.4	0.84	13.1	1.8	2.3	0.78	10.3	1.7	38.5	3537	50.7	2.72	F	3.2	1.2	11.9	1.9
Patient 22	29	1.6	75.9	87.1	11.2	29.8	34.2	78.8	82.6	112.8	1.8	1.1	12	1.8	2	0.84	12.2	1.9	2	0.68	11.9	1.6	38.7	3686	51	2.77	M	3	1.1	12.8	1.8
Patient 23	30	1.61	78.2	89.2	11	30.3	34.6	81.1	82.1	113.2	1.9	0.9	11.6	1.6	2.3	0.78	11.8	1.8	2.1	0.72	10.9	1.7	38.6	3643	49.1	3.08	M	3.1	1.2	12	1.9
Patient 24	31	1.6	76.1	87.9	11.7	29.7	34.3	80.2	82	105.3	2	1.1	10.8	1.7	1.6	0.89	13.4	2	1.9	0.72	10.7	1.5	38.7	3549	50.4	2.77	F	3.3	1.1	12.8	1.8
Patient 25	30	1.57	77.1	87.3	10.2	31.1	35.2	83.6	82.8	109.5	2.2	1	10.7	1.6	2.3	0.79	12.5	1.8	2.1	0.8	11.8	1.6	38.4	3501	50.8	2.67	M	3	1.2	11.6	1.9
Patient 26	29	1.6	79	90.1	11.2	31	35.4	79.2	82.8	104.4	1.8	1	12	1.7	2.3	0.79	12.3	1.7	2.1	0.65	10.5	1.6	38.4	3666	49.9	2.95	M	3.1	1.1	12.2	1.9
Patient 27	32	1.58	77.1	88.7	11.6	30.8	35.5	81.1	82.2	111.4	2.3	1	11.4	1.8	1.6	0.87	13	1.9	2.1	0.7	11.6	1.5	38.5	3587	50.6	2.77	F	3.4	1.1	12.2	1.9
Patient 28	31	1.6	78.9	89.8	10.9	30.9	35.2	81.9	82.5	103.6	2.4	1	10.6	1.7	1.8	0.72	12.6	1.7	1.9	0.67	10.1	1.6	38.6	3533	50.9	2.68	M	2.9	1.1	12.2	1.9
Patient 29	30	1.58	75.7	87.5	11.8	30.3	35	80.6	82.3	111.1	2.4	1.1	12.3	1.7	1.9	0.9	12.8	1.9	2.1	0.78	11.6	1.5	38.6	3520	50.6	2.72	F	3.1	1.2	11.5	1.8
Patient 30	31	1.57	79	89.9	10.9	31.9	36.4	83.1	82	107.1	2.5	1.1	12.3	1.7	1.8	0.72	13	1.8	2	0.68	10.1	1.6	38.7	3638	49.8	2.95	F	2.9	1.1	11.8	2
Patient 31	32	1.58	76.7	87.5	10.8	30.6	34.9	81.5	82.2	112.5	2.1	0.9	11	1.7	1.8	0.88	11.7	1.7	2.2	0.67	11.1	1.5	38.6	3716	50.7	2.86	F	3	1.2	12.5	1.8
Patient 32	29	1.6	79.1	90.4	11.3	30.8	35.2	79.3	82.4	101.5	2	1	11.1	1.7	1.6	0.73	12.7	1.8	2.1	0.62	10.5	1.6	38.7	3653	49.3	3.05	F	3	1.2	12.5	1.9
Patient 33	28	1.59	78.4	88.3	9.9	31	34.9	81.5	82.7	107	1.9	1	12.2	1.8	2.1	0.81	12.3	1.8	2.3	0.73	12.2	1.6	38.6	3570	48.5	3.12	M	3.4	1.2	12.8	1.8
Patient 34	29	1.61	76.3	87.4	11.1	29.6	33.9	82.2	82.5	101.3	1.8	1	11.4	1.7	1.6	0.72	13.3	1.8	2.1	0.61	11.5	1.7	38.4	3729	49.7	3.04	F	3.4	1.2	11.8	1.9
Patient 35	29	1.6	78.4	88.9	10.5	30.7	34.8	83.2	82.5	111	2	1	11.8	1.7	1.9	0.75	12.7	1.7	1.9	0.61	12.2	1.5	38.7	3600	48.7	3.11	M	3.1	1.1	12.5	1.9
Patient 36	28	1.6	75.4	85.4	10	29.4	33.3	83.5	82.4	109.7	2.3	0.9	11.3	1.8	1.9	0.82	13	1.8	2	0.61	11.7	1.5	38.6	3510	50.3	2.75	F	3.4	1.2	11.7	1.9
Patient 37	32	1.61	79.3	89.8	10.5	30.7	34.8	81.1	82.4	105.6	2.5	1.1	10.7	1.7	2	0.85	13.3	2	2.1	0.67	10.7	1.6	38.5	3650	49.8	2.95	M	3.1	1.1	11.8	1.8
Patient 38	28	1.61	79.7	89.9	10.2	30.9	34.8	80.8	82.1	106.6	1.9	1	12.1	1.7	2.1	0.77	11.6	1.9	1.9	0.66	10.6	1.6	38.7	3551	51.4	2.61	F	3.2	1.2	11.8	1.9
Patient 39	32	1.6	79.7	91.4	11.7	31.2	35.8	83.7	82.6	106.9	2.4	1	11.5	1.6	2.1	0.8	12	1.8	2	0.74	10.7	1.7	38.4	3509	51.2	2.62	F	3.1	1.1	11.9	1.9
Patient 40	28	1.6	76.2	86.6	10.4	29.9	33.9	78.7	82.7	111.1	2.2	1	11.6	1.8	2.4	0.84	11.8	1.9	2.1	0.74	11.6	1.5	38.6	3686	48.7	3.2	M	3.2	1.1	11.8	1.9
Patient 41	29	1.61	79.8	90.1	10.4	30.8	34.8	82.9	82.2	113.5	1.7	1	11.9	1.7	1.9	0.86	13	1.9	2.2	0.67	11	1.6	38.5	3463	49.1	2.93	F	3.1	1.2	11.7	2
Patient 42	31	1.57	78.2	88.6	10.4	31.6	35.7	83.3	82.2	113.6	2	1	11.5	1.6	1.8	0.89	12.3	1.8	1.9	0.74	12.2	1.6	38.5	3697	50.4	2.89	M	3.2	1.2	12	1.9
Patient 43	31	1.6	78.1	89.4	11.2	30.6	35	81.4	82.1	111.1	2	0.9	10.8	1.7	2.2	0.79	11.9	2	2.1	0.8	12.2	1.6	38.5	3731	49.7	3.04	M	3.4	1.2	11.4	1.9
Patient 44	31	1.6	76.8	88.4	11.6	30.1	34.6	80.6	82.3	106.6	2.1	1	11.4	1.7	2.1	0.76	13.2	1.7	2.1	0.78	10.8	1.6	38.6	3725	49.2	3.12	F	3.2	1.2	11.9	1.9
Patient 45	31	1.61	77.2	89	11.7	29.9	34.4	80.8	81.9	109.9	2.1	1.1	11	1.6	2.1	0.77	12.3	1.7	2	0.72	10.2	1.5	38.5	3460	49.7	2.81	M	3	1.1	12.5	1.9
Patient 46	31	1.6	78.3	88.3	9.9	30.7	34.6	78.9	82.6	106.4	2.1	0.9	11.2	1.7	2.2	0.75	11.7	1.8	2.2	0.76	11.3	1.5	38.7	3495	50.4	2.72	F	3.4	1.2	12.5	1.8
Patient 47	28	1.6	76.9	87.9	11	30.2	34.5	81.8	81.9	109	1.9	1	12.2	1.7	1.9	0.79	12.2	1.8	2.2	0.65	10.5	1.6	38.5	3639	51.3	2.7	F	3.2	1.1	11.9	1.9
Patient 48	30	1.6	79.1	89.3	10.2	30.8	34.8	78.7	82.5	112.3	1.9	0.9	11.6	1.7	1.9	0.77	12	2	2.2	0.62	11.7	1.6	38.6	3574	50.5	2.78	F	3.2	1.2	11.5	1.9
Patient 49	30	1.62	80.2	94.3	14.1	30.6	35.9	82.1	87.6	161.1	2.7	0.9	12.1	2	2.4	0.89	12.6	2.2	3	0.6	12.7	2.2	36.8	3813	51.2	2.83	F	3.9	0.9	11.2	1
Patient 50	32	1.63	77.8	90.9	13.1	29.1	34.1	80.8	88.1	159.5	2	0.8	11.5	2	3	0.85	12.9	2.1	3.6	0.7	13.1	2.3	37	3907	51.6	2.84	F	4	0.9	10.6	1
Patient 51	29	1.63	77.5	91.5	14	29.3	34.6	81.2	89	172.1	2.1	0.9	10.8	2	2.7	0.69	14.6	2.1	3	0.7	12.2	2.2	37.3	3854	51.4	2.84	M	4.1	0.9	9.5	0.9
Patient 52	33	1.58	78.3	91.8	13.5	31.2	36.6	81.4	89	163.1	1.3	0.9	10.9	2	3.3	0.68	13.1	2.2	3	0.7	12.5	2.2	37.1	3845	50	3.07	F	3.4	0.8	10.7	0.9
Patient 53	28	1.56	77.4	90.3	12.9	31.7	37	80.8	89.4	163.1	2	0.8	11.9	1.9	2.6	0.81	13.9	2.3	3.4	0.6	12.8	2.3	37	4050	52.1	2.86	M	4.1	0.9	10.8	0.9
Patient 54	31	1.62	80.1	94.1	14	30.5	35.9	81.5	86.9	171.9	2	0.8	12	1.9	3.3	0.76	12.1	2.2	3.3	0.7	12.4	2.3	37.1	3826	50.9	2.91	F	3.7	0.9	11.1	1
Patient 55	26	1.65	78.5	91.1	12.6	29	33.6	81.6	87.3	158	2.7	0.8	12	1.9	3.1	0.69	12.1	2.2	3.9	0.6	12.3	2.3	37.6	3859	51.9	2.77	F	3.9	0.9	11.1	0.9
Patient 56	28	1.56	75.5	89.6	14.1	31	36.7	81.3	87.1	157.4	3.3	0.9	12.5	1.9	2.5	0.84	12.1	2.3	3.5	0.6	11.8	2.2	37.4	4020	50.9	3.05	M	3.8	0.8	10	1
Patient 57	30	1.62	75.8	88.7	12.9	29	33.9	82.3	88	155.9	1.3	0.9	12.5	2	3	0.83	12.8	2.2	3.2	0.6	11.8	2.2	37	3854	49.8	3.12	F	4	0.8	10.5	0.9
Patient 58	27	1.6	78.4	91.3	12.8	30.6	35.6	81.9	89.9	165.3	1.5	1	11.8	1.9	2.4	0.78	13.9	2.1	3.2	0.6	12.4	2.3	37.7	3911	50.6	3.02	M	3.7	0.8	10.6	0.9
Patient 59	28	1.61	80	93.3	13.3	31	36.1	80.8	87.1	161.7	1.8	0.8	11.5	2	2.6	0.81	14.3	2.2	3.1	0.6	12	2.3	36.9	3808	52.3	2.66	M	3.7	0.9	9.7	0.9
Patient 60	32	1.56	79.5	93.1	13.6	32.5	38	82.3	89.4	157.5	3.1	0.8	12	1.9	3.4	0.88	13.8	2.2	3.8	0.7	12	2.2	37.2	3913	51.4	2.88	M	3.6	0.9	10.8	0.9
Patient 61	27	1.56	77.3	90.3	13.1	32	37.4	81.6	86.4	170.8	2.9	0.9	12.1	2	2.6	0.61	14.7	2.3	3.6	0.7	12.5	2.2	36.9	3773	51	2.85	F	4	0.8	10.9	1
Patient 62	30	1.63	76.9	89.6	12.7	28.9	33.7	82.9	87.6	171.3	2.2	0.8	12.2	2	2.9	0.78	13	2.3	3.7	0.7	11.9	2.3	36.6	3794	49.7	3.1	M	3.9	0.8	11	1
Patient 63	30	1.65	77.5	91.2	13.6	28.5	33.5	80.8	89.5	166	2.2	0.9	12.1	1.9	3.5	0.89	13.2	2.1	3.1	0.6	11.7	2.3	37	3860	50.1	3.07	M	4	0.9	11.5	1
Patient 64	29	1.64	77.8	91.4	13.6	29	34.1	81.7	86.3	159.4	2.2	0.9	12.1	1.9	3.5	0.83	13.6	2.1	3.4	0.7	13	2.3	37.5	3940	50.4	3.08	M	3.4	0.8	11.1	1
Patient 65	30	1.63	80	93.6	13.6	30.3	35.4	82	88.8	159.9	2.2	1	11.7	2	2.4	0.63	12.7	2.2	3	0.6	13.3	2.2	37.2	4044	52.3	2.83	F	4	0.9	11.1	0.9
Patient 66	30	1.6	77.8	90.4	12.6	30.3	35.2	82.3	86.7	162	3.1	0.8	11.1	1.9	2.6	0.66	13.5	2.1	3.8	0.6	12	2.2	36.8	3956	52.1	2.79	M	4	0.8	10	1
Patient 67	27	1.55	77.5	90.8	13.4	32.1	37.6	81.9	87.7	164.8	2.6	0.9	11.8	1.9	3.4	0.71	13.5	2.2	3.6	0.6	13.3	2.3	37.9	3828	52.2	2.68	F	3.5	0.9	11.9	1
Patient 68	29	1.6	79.5	92.5	13	31	36.1	82.8	87.5	157.7	2	0.9	11.4	2	3.4	0.67	12.9	2.1	3.2	0.6	12.4	2.2	37.4	3929	50.4	3.07	M	3.5	0.8	10.4	0.9
Patient 69	29	1.62	76.3	90.4	14.1	28.9	34.2	82.6	87.1	169.4	2.1	0.9	12.1	1.9	2.8	0.79	12.2	2.3	3.8	0.7	13	2.2	37.6	3775	51.7	2.74	F	3.4	0.9	11	1
Patient 70	29	1.58	76.3	88.9	12.6	30.7	35.8	81.6	86.7	164.2	2.2	1	12.2	1.9	2.5	0.61	14.2	2.2	3.5	0.7	12.3	2.3	37.9	3798	51	2.86	M	3.9	0.8	11.7	0.9
Patient 71	31	1.6	79.4	91.8	12.4	31	35.8	82.6	89.2	157.1	3.2	0.9	11.5	1.9	3.3	0.76	12.1	2.2	3.2	0.6	12.9	2.2	37.9	3828	50.6	2.95	F	4.1	0.9	11.8	0.9
